# Supplementary material
Source: PubMed Central journal article supplement (PMC6439837)
Supplement: jamaoncol-5-393-s002.pdf [file jamaoncol-5-393-s002.pdf]

## Supplementary Online Content

Disis ML, Taylor MH, Kelly K, et al. Efficacy and safety of avelumab for patients with recurrent or refractory ovarian cancer: phase 1b results from the JAVELIN Solid Tumor Trial. *JAMA Oncol*. Published online January 24, 2019.  
doi:10.1001/jamaoncol.2018.6258

**eTable 1.** Sites Of Enrollment

**eTable 2.** Clinical Activity Based on PD-L1 Status in Evaluable Patients (N=114)

**eFigure.** Kaplan–Meier Estimates of (A) Progression-Free Survival and (B) Overall Survival (N=125)

This supplementary material has been provided by the authors to give readers additional information about their work.

**eTable 1. Sites of Enrollment**

| <b>Site PI</b>          | <b>Site Name</b>                                                                | <b>Patients</b> |
|-------------------------|---------------------------------------------------------------------------------|-----------------|
| Taylor, Matthew         | Knight Cancer Institute–Oregon Health & Science University, Portland, OR, USA   | 8               |
| Kelly, Karen            | University of California–Davis Comprehensive Cancer Center, Sacramento, CA, USA | 7               |
| Beck, Joseph            | Highlands Oncology Group, Fayetteville, AR, USA                                 | 6               |
| Disis, Mary             | University of Washington School of Medicine, Seattle, WA, USA                   | 6               |
| Gordon, Michael         | HonorHealth Research Institute, Scottsdale, AZ, USA                             | 6               |
| Aljumaily, Raid         | Peggy and Charles Stephenson Oklahoma Cancer Center, Oklahoma City, OK, USA     | 5               |
| Gulley, James           | National Cancer Institute, Bethesda, MD, USA                                    | 5               |
| Lee, Wes                | St Joseph Heritage Healthcare, Santa Rosa, CA, USA                              | 5               |
| Patel, Manish           | Sarah Cannon Research Institute/Florida Cancer Specialists, Sarasota, FL, USA   | 5               |
| Chaves, Jorge           | Northwest Medical Specialties, Tacoma, WA, USA                                  | 4               |
| Lockhart, Albert        | Washington University School of Medicine, St. Louis, MO, USA                    | 4               |
| Mita, Alain             | Cedars Sinai Medical Center, Los Angeles, CA, USA                               | 4               |
| Ellerton, John          | Southern Nevada Cancer Research Foundation, Las Vegas, NV, USA                  | 3               |
| Hays, John              | Ohio State University–James Comprehensive Cancer Center, Columbus, OH, USA      | 3               |
| Iannotti, Nicholas      | Hematology Oncology Associates of the Treasure Coast, Port St. Lucie, FL, USA   | 3               |
| Infante, Jeffrey        | SCRI–Tennessee Oncology, Nashville, TN, USA                                     | 3               |
| Verschraegen, Claire    | University of Vermont Medical Center, Burlington, VT, USA                       | 3               |
| Wang, Ding              | Henry Ford Hospital, Detroit, MI, USA                                           | 3               |
| Weiss, Glen             | Cancer Treatment Centers of America, Goodyear, AZ, USA                          | 3               |
| Babiker, Hani           | Scottsdale Healthcare Corporation, Scottsdale, AZ, USA                          | 2               |
| Chandler, Jason         | West Cancer Center, Memphis, TN, USA.                                           | 2               |
| Dirix, Luc              | Sint Augustinus-University of Antwerp, Antwerp, Belgium                         | 2               |
| Emens, Leisha           | The John Hopkins University School of Medicine, Baltimore, MD, USA              | 2               |
| Gurtler, Jayne          | Metairie Oncologist, Metairie, LA, USA                                          | 2               |
| Jerusalem, Guy          | CHU Sart Tilman, Liege, Belgium                                                 | 2               |
| Kochuparambil, Samith   | Virginia Piper Cancer Institute, Minneapolis, MN, USA                           | 2               |
| Malcolm, Albert         | Signal Point Clinical Research Center, Middletown, OH, USA                      | 2               |
| Neidhart, Jeffrey       | San Juan Oncology Associates, Farmington, NM, USA                               | 2               |
| Nikolinakos, Petros     | Northeast Georgia Cancer Care, Athens, GA, USA.                                 | 2               |
| Peguero, Julio          | Oncology Consultants, Houston, TX, USA                                          | 2               |
| Vaishampayan, Ulka      | Karmanos Cancer Institute, Detroit, MI, USA                                     | 2               |
| Arkenau, Hendrik-Tobias | Sarah Cannon Research Institute, London, UK                                     | 1               |
| Boccia, Ralph           | Regional Cancer Care Associates, Bethesda, MD, USA                              | 1               |
| Dowlati, Afshin         | University Hospitals Case Medical Center, Cleveland, OH, USA                    | 1               |
| Eder, Joseph            | Yale Cancer Center, New Haven, CT, USA                                          | 1               |
| Frank, Richard          | Whittingham Cancer Center, Norwalk, CT, USA                                     | 1               |
| Hamid, Omid             | The Angeles Clinic and Research Institute, Los Angeles, CA, USA                 | 1               |
| Khleif, Samir           | Georgia Cancer Center–Augusta University, Augusta, GA, USA                      | 1               |
| McCune, Steven          | Northwest Georgia Oncology Centers, Marietta, GA, USA                           | 1               |

|                  |                                                                |   |
|------------------|----------------------------------------------------------------|---|
| Mehnert, Janice  | Rutgers Cancer Institute of New Jersey, New Brunswick, NJ, USA | 1 |
| Nemunaitis, John | Mary Crowley Cancer Research Centers, Dallas, TX, USA          | 1 |
| Powderly, John   | Carolina BioOncology Institute, Huntersville, NC, USA          | 1 |
| Robles, Robert   | Bay Area Cancer Research Group, Pleasant Hill, CA, USA         | 1 |
| Somer, Robert    | Cooper Hospital University Medical Center, Camden, NJ, USA     | 1 |
| Villa, Luis      | AMPM Research Clinic, Miami Gardens, FL, USA                   | 1 |
| Wong, Deborah    | University of California at Los Angeles, Los Angeles, CA, USA  | 1 |

**eTable 2.** Clinical Activity Based on PD-L1 Status in Evaluable Patients (N=114)

| PD-L1 Cutoff                          | PD-L1+           | PD-L1–           | P Value | Hazard Ratio |
|---------------------------------------|------------------|------------------|---------|--------------|
| ≥1% in tumor cells                    |                  |                  |         |              |
| No. of patients                       | 76               | 38               |         |              |
| ORR (95% CI), %                       | 11.8 (5.6-21.3)  | 7.9 (1.7-21.4)   | .748    |              |
| Median PFS (95% CI), mo               | 2.7 (1.5-3.0)    | 1.4 (1.3-2.7)    |         | 0.764        |
| 12-month rate (95% CI), %             | 8.8 (3.5-17.1)   | 10.9 (3.1-24.4)  |         |              |
| Median OS (95% CI), mo                | 13.8 (9.6-16.1)  | 7.0 (5.8-18.7)   |         | 0.880        |
| 12-month rate (95% CI), %             | 53.1 (41.0-63.9) | 36.6 (20.6-52.9) |         |              |
| ≥5% in tumor cells                    |                  |                  |         |              |
| No. of patients                       | 32               | 82               |         |              |
| ORR (95% CI), %                       | 12.5 (3.5-29.0)  | 9.8 (4.3-18.3)   | .737    |              |
| Median PFS (95% CI), mo               | 2.7 (1.4-4.0)    | 2.2 (1.4-2.7)    |         | 0.881        |
| 12-month rate (95% CI), %             | 11.7 (3.4-25.8)  | 8.2 (3.2-16.2)   |         |              |
| Median OS (95% CI), mo                | 10.6 (7.1-20.6)  | 11.9 (7.5-16.1)  |         | 1.131        |
| 12-month rate (95% CI), %             | 49.8 (30.9-66.2) | 47.4 (35.7-58.1) |         |              |
| ≥10% in tumor-associated immune cells |                  |                  |         |              |
| No. of patients                       | 16               | 98               |         |              |
| ORR (95% CI), %                       | 0 (0-20.6)       | 12.2 (6.5-20.4)  | .212    |              |
| Median PFS (95% CI), mo               | 1.5 (1.3-5.4)    | 2.6 (1.4-2.8)    |         | 0.842        |
| 12-month rate (95% CI), %             | 18.8 (4.6-40.2)  | 7.7 (3.2-14.6)   |         |              |
| Median OS (95% CI), mo                | 11.0 (7.6-16.1)  | 11.9 (7.0-16.1)  |         | 0.959        |
| 12-month rate (95% CI), %             | 48.2 (20.8-71.2) | 48.0 (37.4-57.8) |         |              |

ORR, objective response rate; OS, overall survival; PD-L1, programmed death-ligand 1; PFS, progression-free survival.

**eFigure.** Kaplan–Meier Estimates of (A) Progression-Free Survival and (B) Overall Survival (N=125)

**A.**

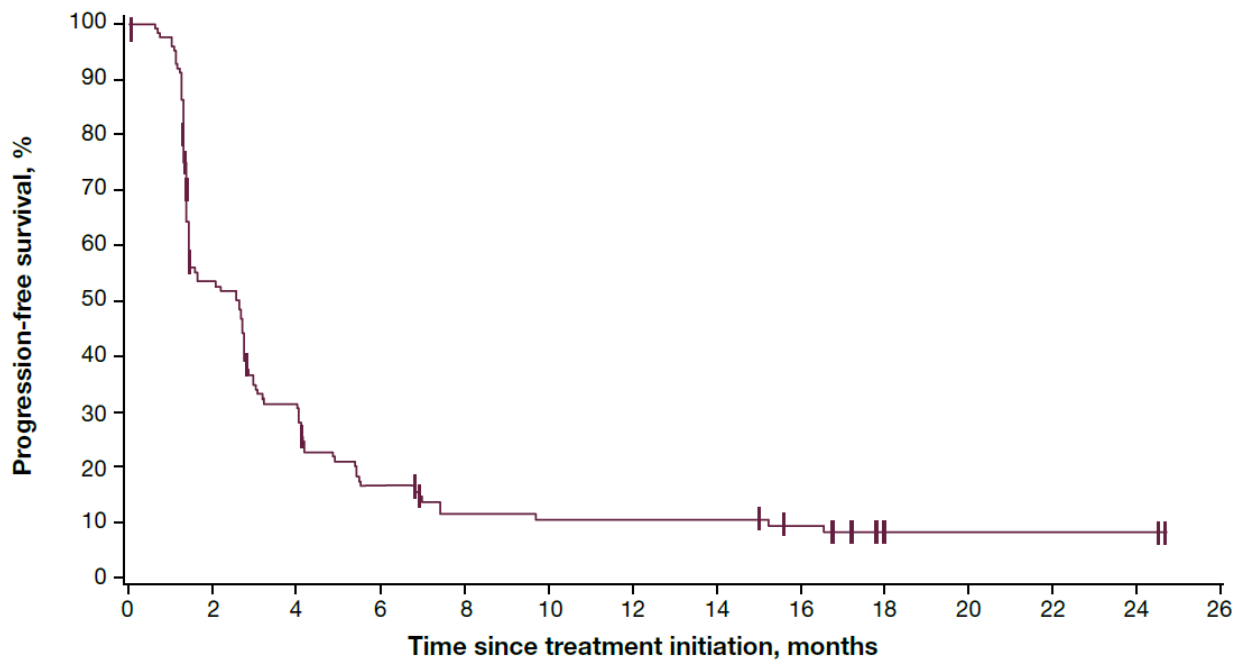

Number at risk 125 63 36 18 11 10 10 10 7 2 2 2 2 0

**B.**

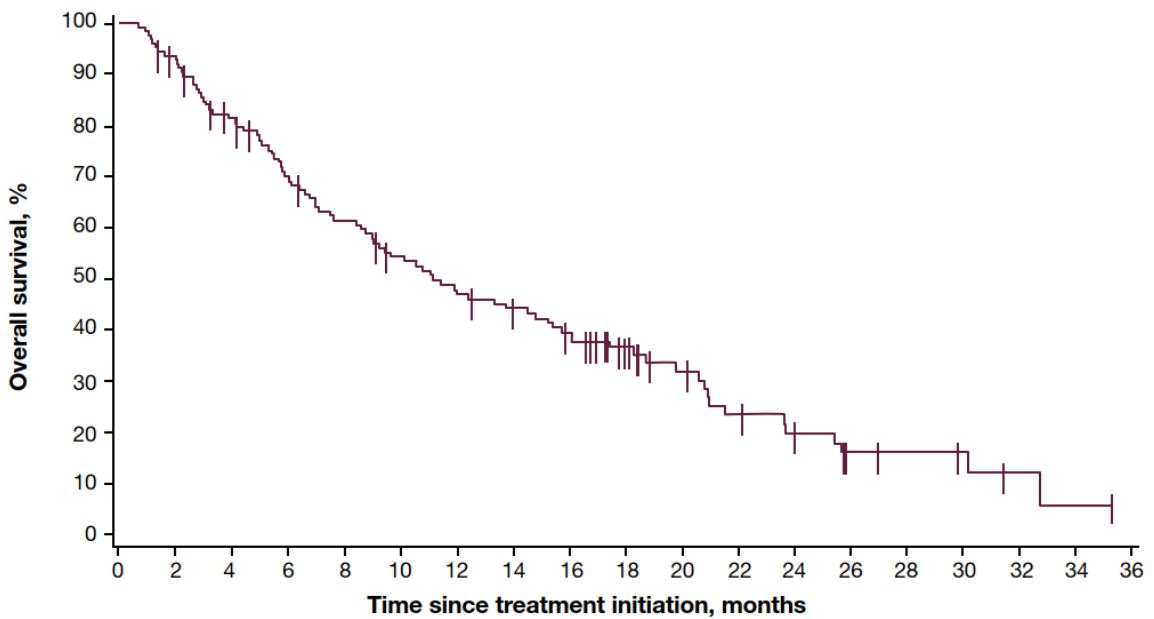

Number at risk 125 114 96 81 70 60 52 47 41 28 20 14 11 6 5 4 2 1 0
